# Supplementary material
Source: PubMed Central journal article supplement (PMC2818095)

# Supplementary Figure 5

**a**

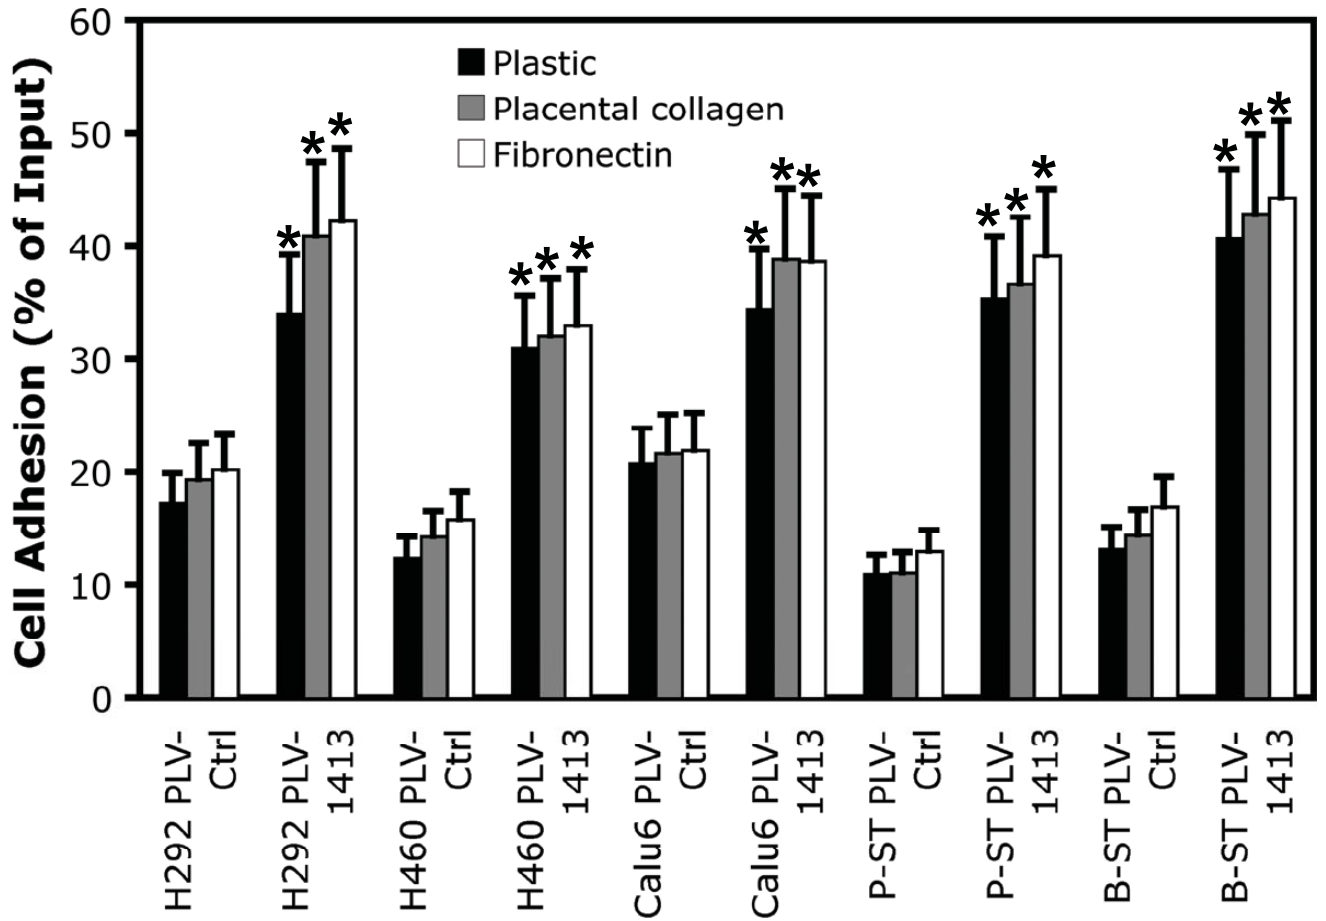

**b**

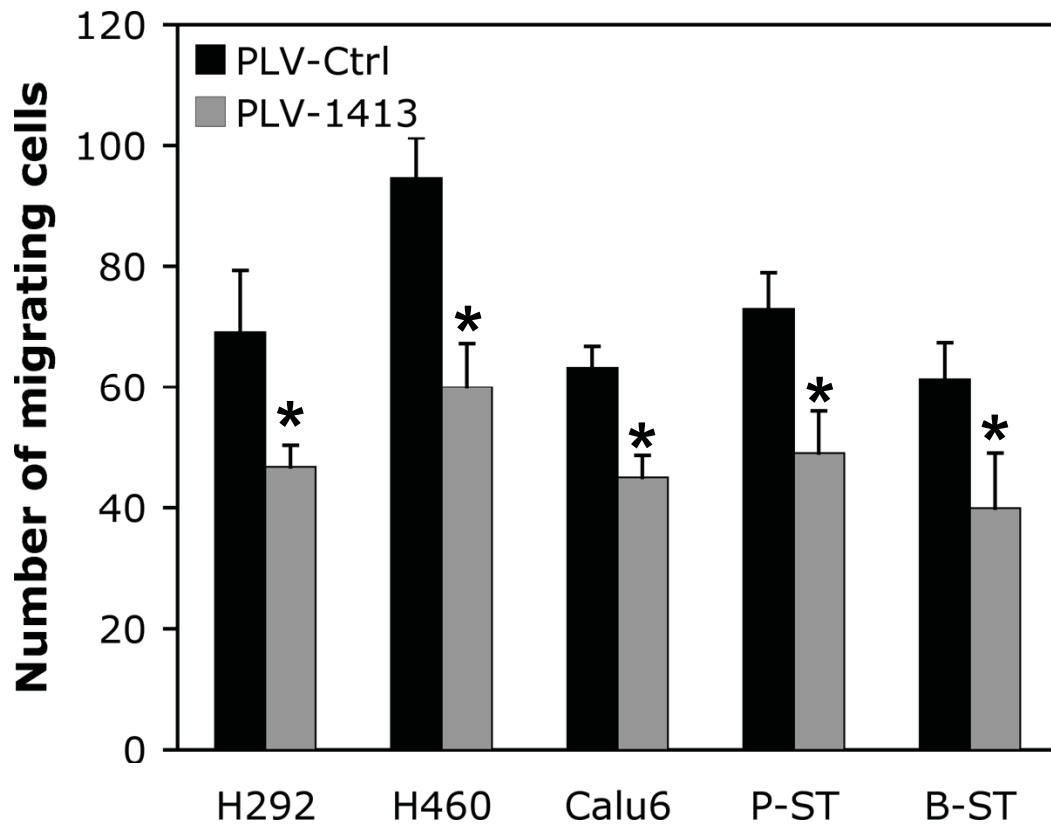

Supplement: NIHMS141344-supplement-Supp_Fig_5.pdf [file NIHMS141344-supplement-Supp_Fig_5.pdf]
